# Supplementary material for: Addition of TLR9 agonist immunotherapy to radiation improves systemic antitumor activity
Source: PubMed Central journal article supplement — Transl Oncol. 2020 Dec 16;14(2):100983. doi: 10.1016/j.tranon.2020.100983 (PMC7750418; doi:10.1016/j.tranon.2020.100983), 2020-12-16
Supplement: mmc1.pdf [file mmc1.pdf]

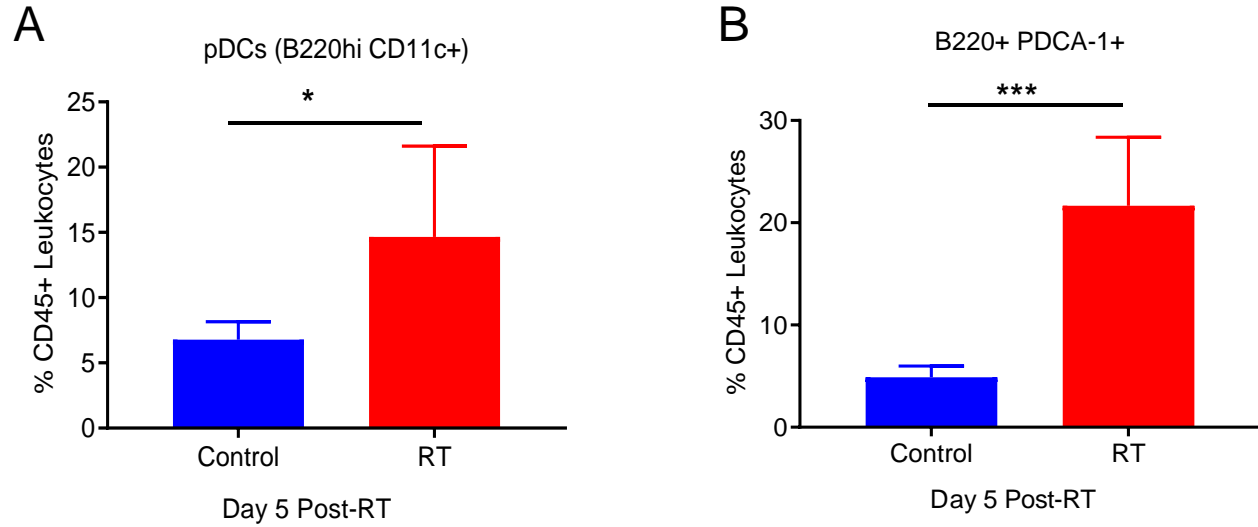

**Supplemental Figure S1. High-dose radiotherapy (RT) increased the percentage of plasmacytoid dendritic cells (pDCs).** To confirm the results shown in Figure 1, we used additional markers to identify pDCs (B220, CD11c, and PDCA-1) and found that high-dose RT (three 12-Gy fractions) significantly increased the percentage of B220hi CD11c<sup>+</sup> pDCs (**A**) and B220<sup>+</sup> PDCA-1<sup>+</sup> cells (**B**) at 5 days after RT.

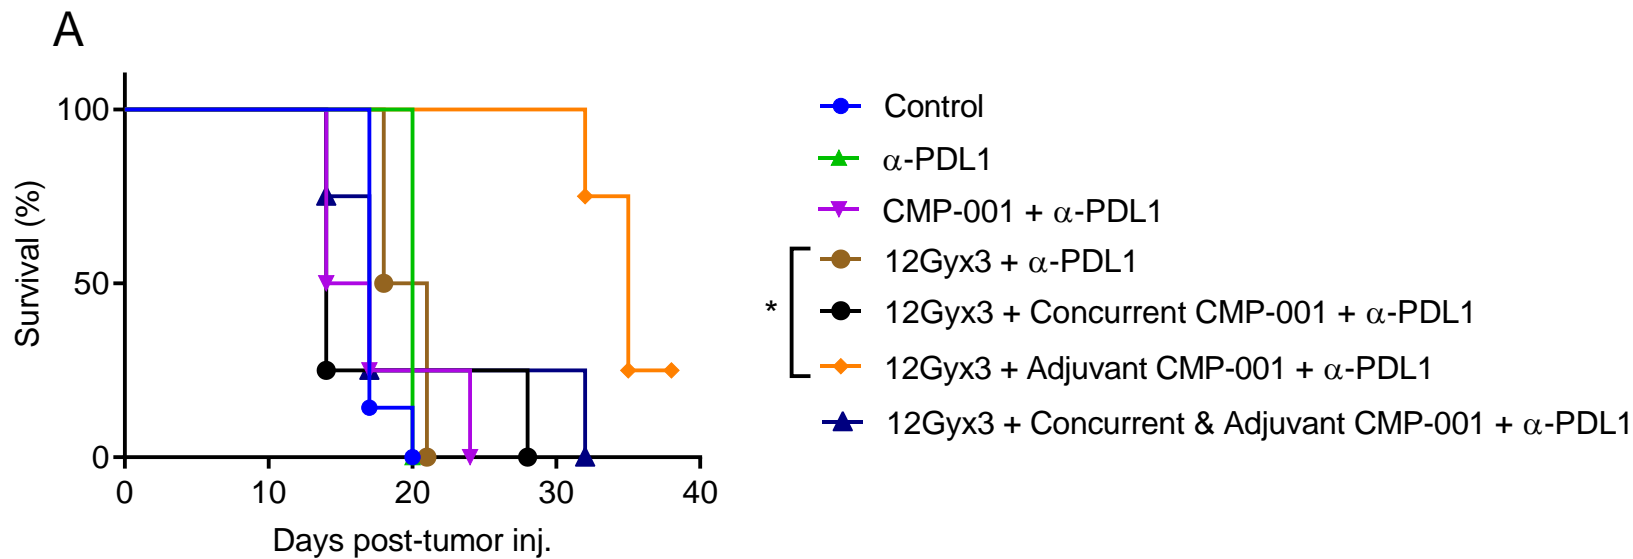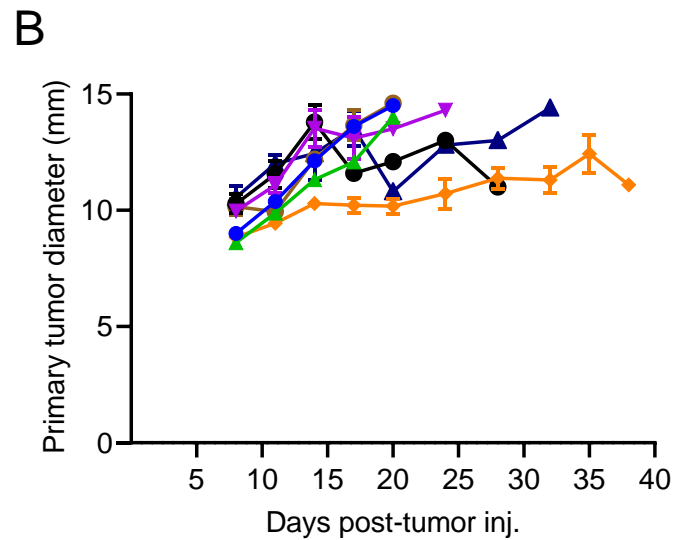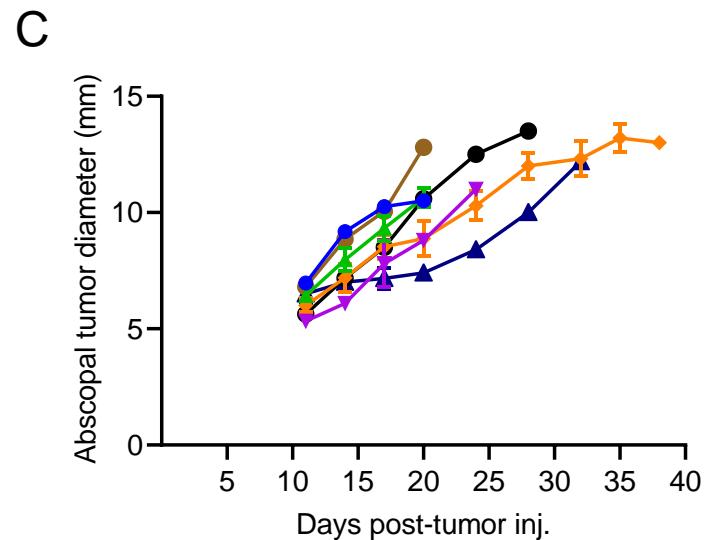

**Supplemental Figure S2. Repeated intratumoral injections of CMP-001, in combination with anti-PDL1, after radiotherapy (RT) delayed tumor growth.** To optimize sequencing of CMP-001 with RT, we tested CMP-001 given as concurrent I.T. Injections, adjuvant I.T. injections, or concurrent & adjuvant I.T. injections (Mice = 4 per group). Adjuvant I.T. injections of CMP-001 given after RT led to better survival (**A**) and delayed tumor growth (**B,C**) compared with the other treatment conditions. For the concurrent setting, CMP-001 was given with the first fraction of RT; while in the adjuvant setting, two CMP-001 doses were given 3 days and 10 days after RT. Anti-PDL1 (200 $\mu$ g i.p.) was given on days 5, 8, 12, and 16 post-tumor inoculation.

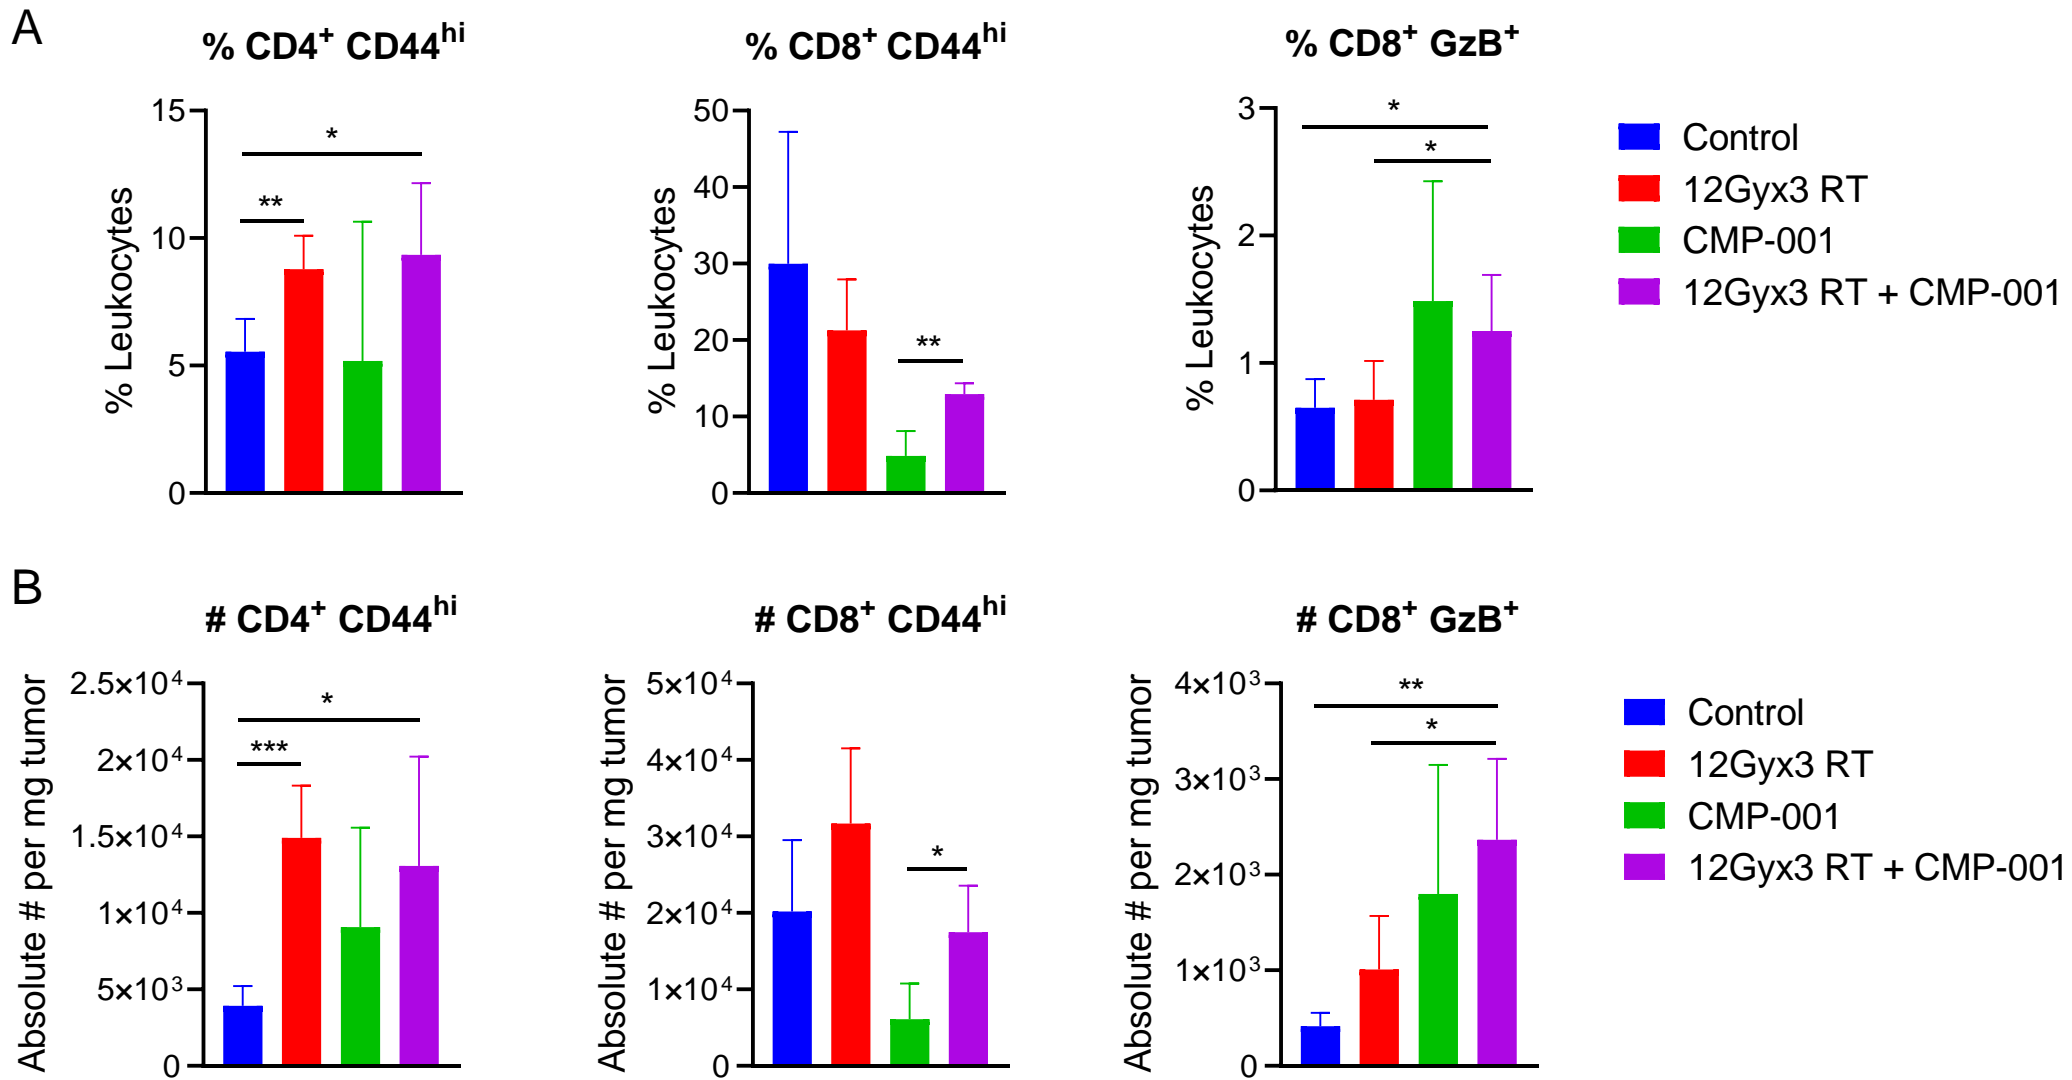

**Supplemental Figure S3. Stereotactic RT + CMP-001 treatment upregulated activated T-cells in primary tumor microenvironment.**

344SQ tumors were bilaterally established in the hind legs of 129Sv/Ev mice (n=4/group). RT was delivered to primary tumors on days 6,7,8 and CMP-001 was given I.T. on days 11,14,19. Primary tumors were harvested on day 20, weighed, and processed for TILs phenotyping using flow cytometry. **(A)** Percentages and **(B)** cell numbers of activated T-cells per mg of tumor tissue. Cells were gated on leukocytes, followed by CD45<sup>+</sup> population, followed by CD4<sup>+</sup> CD44<sup>hi</sup> or CD8<sup>+</sup> CD44<sup>hi</sup> or CD8<sup>+</sup> GranzymeB<sup>+</sup> subpopulations. Student t-tests were conducted between groups. \**P* ≤ 0.05, \*\**P* ≤ 0.01, \*\*\**P* ≤ 0.001.

A

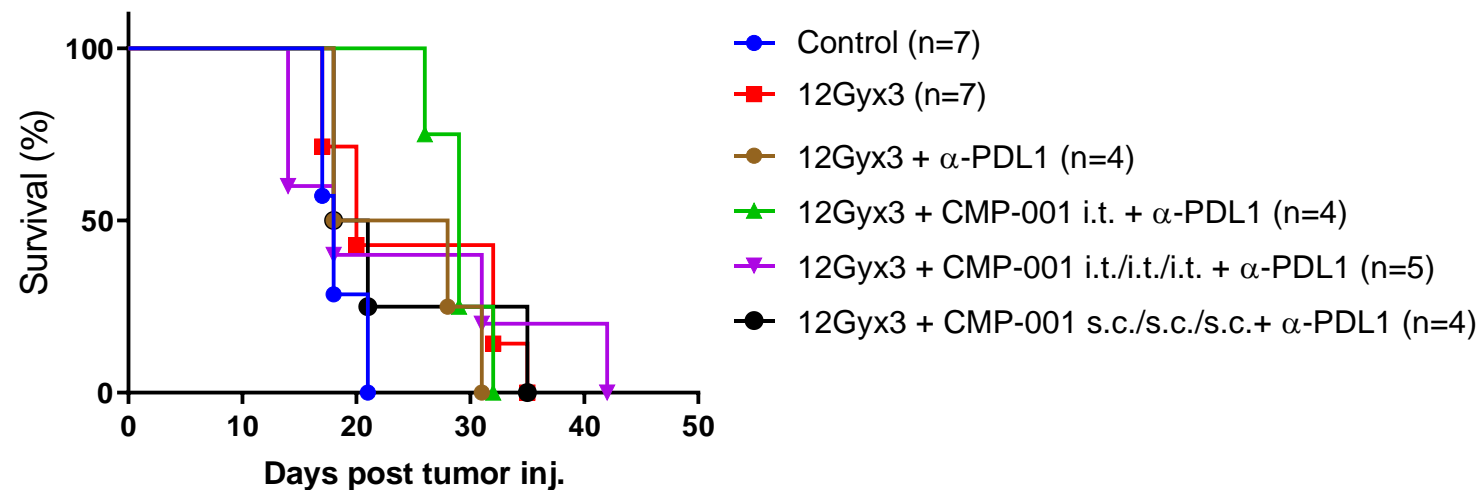

B

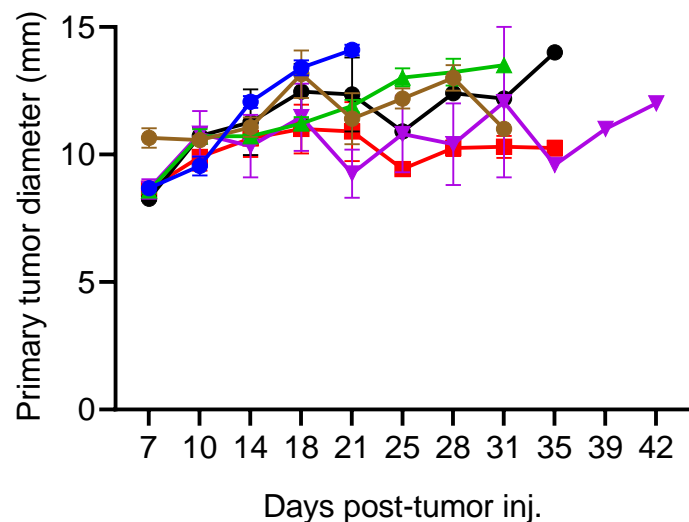

C

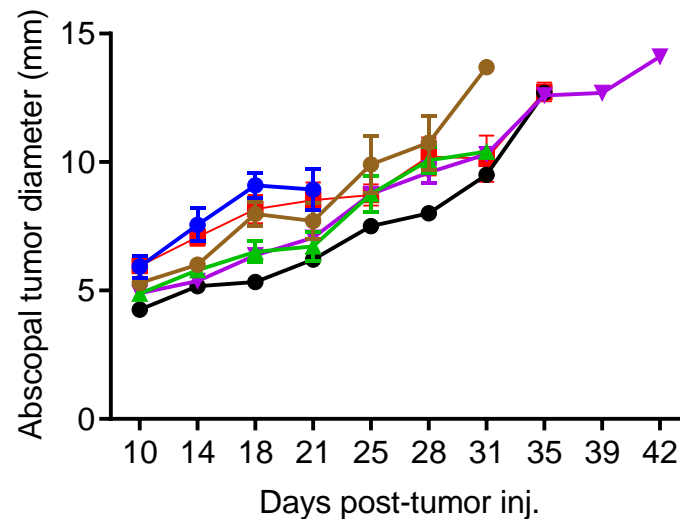

**Supplemental Figure S4. Intratumoral CMP-001 injection led to increased survival as compared with subcutaneous delivery in a 344SQ lung adenocarcinoma model.** We followed the same experimental schedule as in Figure 1A, with the addition of  $\alpha$ -PDL1 checkpoint inhibitor on days 5, 9, 13, and 17. The CMP-001 was given as repeated I.T. injections vs single I.T. injection vs repeated S.C. injections. Repeated I.T. injections of CMP-001 after radiotherapy (RT) led to slightly better survival, but had little effect on tumor control, as compared with repeated S.C. injections.
